# Supplementary material for: Oligomeric phenylpropanoids having new skeletons and hypoglycemic activity from Magnolia officinalis var. biloba
Source: Royal Society of Chemistry journal article supplement (doi:10.1039/d1qo00795e), 2021-01-01

Oligomeric phenylpropanoids bearing new skeleton and hypoglycemic activity from  
*Magnolia officinalis* var. *biloba*

Kailing Xu, Chuan Li, Chuangjun Li, Jie Ma, Yingda Zang, Fei Ye\* and Dongming Zhang\*

State Key Laboratory of Bioactive Substance and Function of Natural Medicines, Institute of Materia Medica,  
Chinese Academy of Medical Sciences and Peking Union Medical College, Beijing 100050, China

---

\* Corresponding author.

*E-mail address:* yefei@imm.ac.cn

\* Corresponding author.

*E-mail address:* zhangdm@imm.ac.cn

# Supporting Information

## Table of contents

1. X-ray crystallographic analysis of maglignan C (3) .....S1
2. Bioassay results .....S1
3. NMR, HRESIMS, IR, UV, ECD spectra of maglignans A–C (1–3).....S3

## 1. X-ray crystallographic analysis of maglignan C (3)

Colorless crystals of compound **3** (CCDC: 2043305) were crystallized in CH<sub>3</sub>CN-CH<sub>2</sub>Cl<sub>2</sub>. Crystal data: C<sub>28</sub>H<sub>34</sub>O<sub>2</sub>, M = 402.55, monoclinic, space group P2<sub>1</sub> (no. 4), *a* = 10.27250(10) Å, *b* = 9.64240(10) Å, *c* = 23.2486(2) Å, β = 90.2730(10)°, *V* = 2302.78(4) Å<sup>3</sup>, *Z* = 4, *T* = 100.00(10) K, μ(Cu Kα) = 0.547 mm<sup>-1</sup>, 52110 reflections measured, and 8309 unique (*R*<sub>int</sub> = 0.0559, *R*<sub>sigma</sub> = 0.0310). These parameters were used in all calculations. The final *R*<sub>1</sub> was 0.0419 and *wR*<sub>2</sub> was 0.1063. Flack parameter = -0.05(7). The data can be accessed via [www.ccdc.cam.ac.uk](http://www.ccdc.cam.ac.uk)

**Table S1** Crystal data and structure refinement for compound **3**.

| Identification code                                           |                                                | moz_4_5a                                           |              |
|---------------------------------------------------------------|------------------------------------------------|----------------------------------------------------|--------------|
| Bond precision:                                               | C-C = 0.0039 Å                                 | Wavelength = 1.54178                               |              |
| Cell:                                                         | a=10.2725(1)                                   | b=9.6424(1)                                        | c=23.2486(2) |
|                                                               | alpha=90                                       | beta=90.273(1)                                     | gamma=90     |
| Temperature:                                                  | 100 K                                          |                                                    |              |
|                                                               | Calculated                                     | Reported                                           |              |
| Volume                                                        | 2302.78(4)                                     | 2302.78(4)                                         |              |
| Space group                                                   | P2 <sub>1</sub>                                | P12 <sub>1</sub> 1                                 |              |
| Hall group                                                    | P2yb                                           | P2yb                                               |              |
| Moiety formula                                                | C <sub>28</sub> H <sub>34</sub> O <sub>2</sub> | C <sub>28</sub> H <sub>34</sub> O <sub>2</sub>     |              |
| Sum formula                                                   | C <sub>28</sub> H <sub>34</sub> O <sub>2</sub> | C <sub>28</sub> H <sub>34</sub> O <sub>2</sub>     |              |
| Mr                                                            | 402.55                                         | 402.55                                             |              |
| Dx (g/cm <sup>-3</sup> )                                      | 1.161                                          | 1.161                                              |              |
| <i>Z</i>                                                      | 4                                              | 4                                                  |              |
| Mu (mm <sup>-1</sup> )                                        | 0.547                                          | 0.547                                              |              |
| F000                                                          | 872.0                                          | 872.0                                              |              |
| F000'                                                         | 874.32                                         |                                                    |              |
| h, k, l max                                                   | 12, 11, 28                                     | 12, 11, 28                                         |              |
| Nref                                                          | 8432[4489]                                     | 8309                                               |              |
| Tmin, Tmax                                                    | 0.961, 0.978                                   | 0.607, 1.000                                       |              |
| Tmin'                                                         | 0.921                                          |                                                    |              |
| Correction method= # Reported T Limits: Tmin=0.607 Tmax=1.000 |                                                |                                                    |              |
| AbsCorr = MULTI-SCAN                                          |                                                |                                                    |              |
| Data completeness=                                            | 1.85/0.99                                      | Theta(max)= 68.243                                 |              |
| R(reflections)=                                               | 0.0419(7842)                                   | <i>wR</i> <sub>2</sub> (reflections)= 0.1063(8309) |              |
| S =                                                           | 1.057                                          | Npar= 576                                          |              |

## 2. Bioassay results

**Table S2**  $\alpha$ -Glucosidase inhibitory activities of **1–3**.

| No.           | Inhibition rate (%) | IC <sub>50</sub> ( $\mu$ M) |
|---------------|---------------------|-----------------------------|
| Acarbose      | 75.2 <sup>a</sup>   | –                           |
| <b>1</b>      | 86.4 <sup>b</sup>   | 1.49                        |
| (+)- <b>1</b> | 86.0 <sup>b</sup>   | 1.77                        |
| (-)- <b>1</b> | 78.9 <sup>b</sup>   | 2.16                        |
| <b>2</b>      | 12.8 <sup>b</sup>   | –                           |
| <b>3</b>      | 3.7 <sup>b</sup>    | –                           |

<sup>a</sup> 200  $\mu$ M.

<sup>b</sup> 10  $\mu$ M.

**Table S3** PTP1B inhibitory activities of **1–3**.

| No.                  | Inhibition rate (10 $\mu$ M, %) | IC <sub>50</sub> ( $\mu$ M) |
|----------------------|---------------------------------|-----------------------------|
| CC06240 <sup>a</sup> | 99.2                            | –                           |
| <b>1</b>             | 87.6                            | 0.309                       |
| (+)- <b>1</b>        | 88.8                            | 0.448                       |
| (-)- <b>1</b>        | 88.3                            | 0.582                       |
| <b>2</b>             | 55.7                            | –                           |
| <b>3</b>             | -1.6                            | –                           |

<sup>a</sup> Positive control substance.

### 3. NMR, HRESIMS, IR, UV, ECD spectra of maglignans A–C (1–3)

#### Maglignan A (1)

Fig. S2. <sup>1</sup>H NMR spectrum (500 MHz, DMSO-*d*<sub>6</sub>) of maglignan A (1).

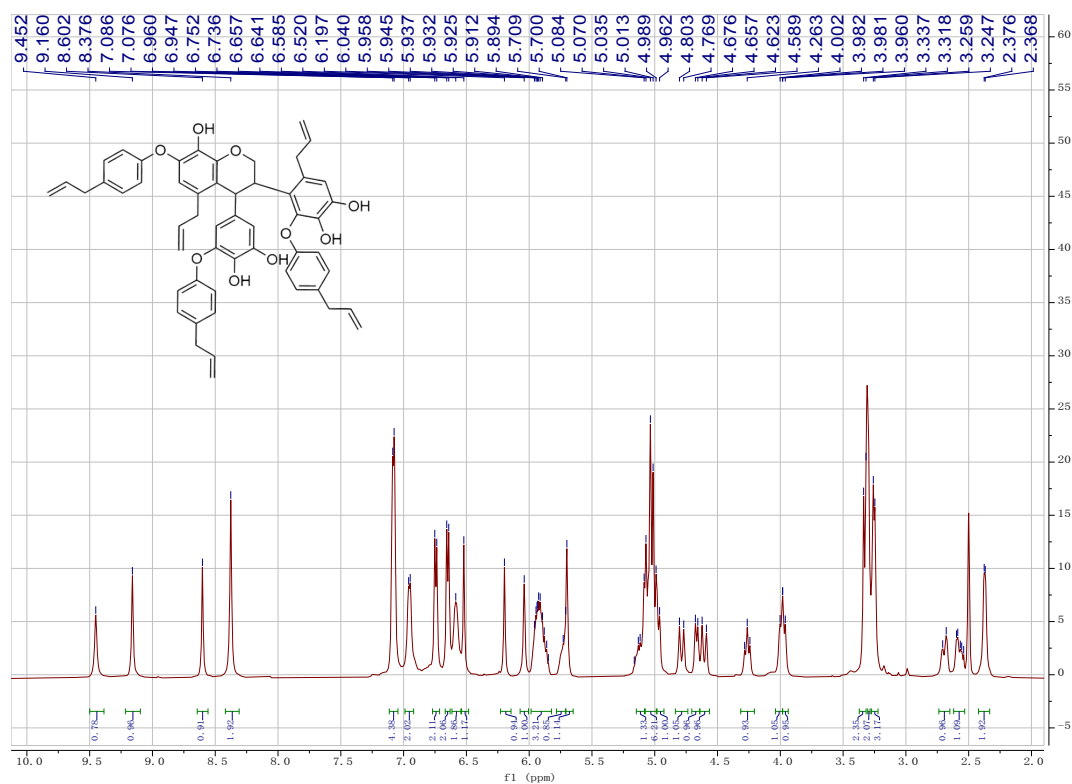

Fig. S3. <sup>13</sup>C NMR spectrum (100 MHz, DMSO-*d*<sub>6</sub>) of maglignan A (1).

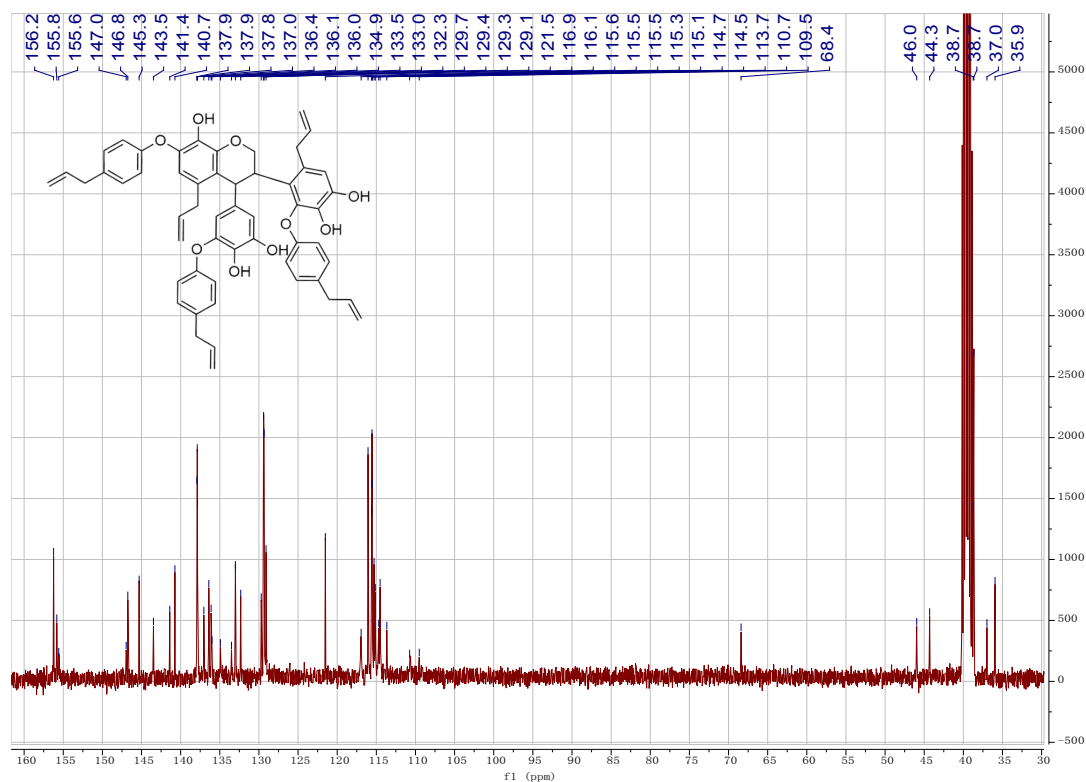

Fig. S4. DEPT spectrum of maglignan A (1).

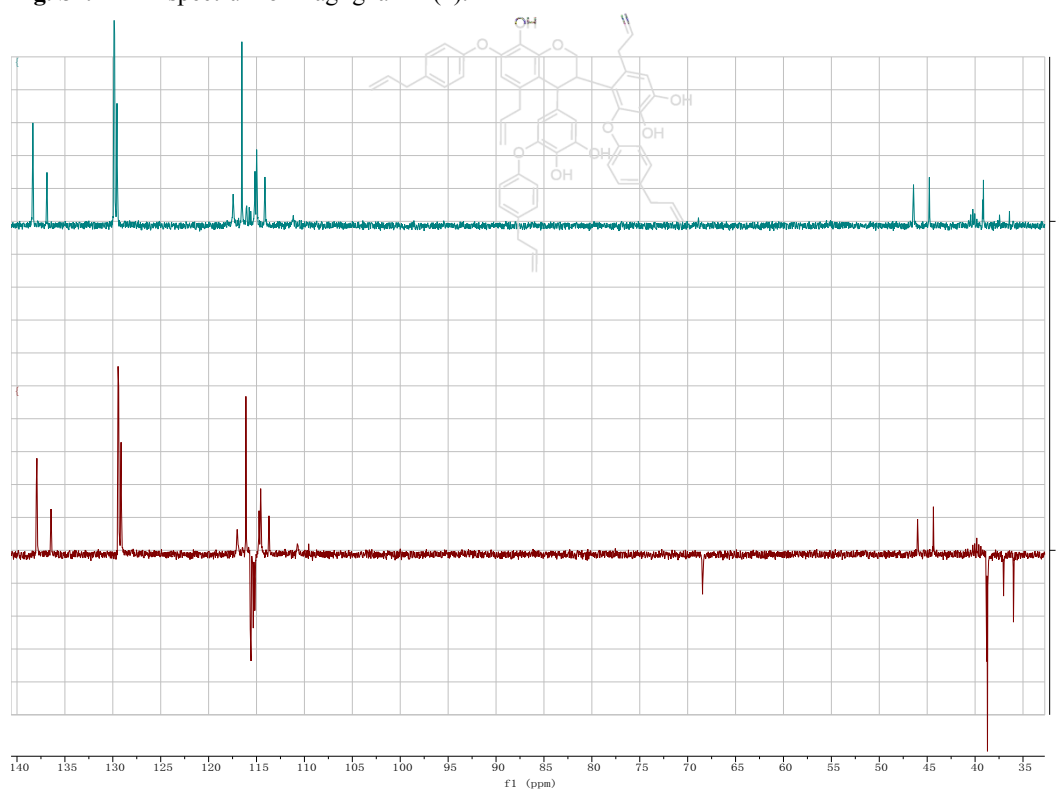

Fig. S5. HSQC spectrum of maglignan A (1).

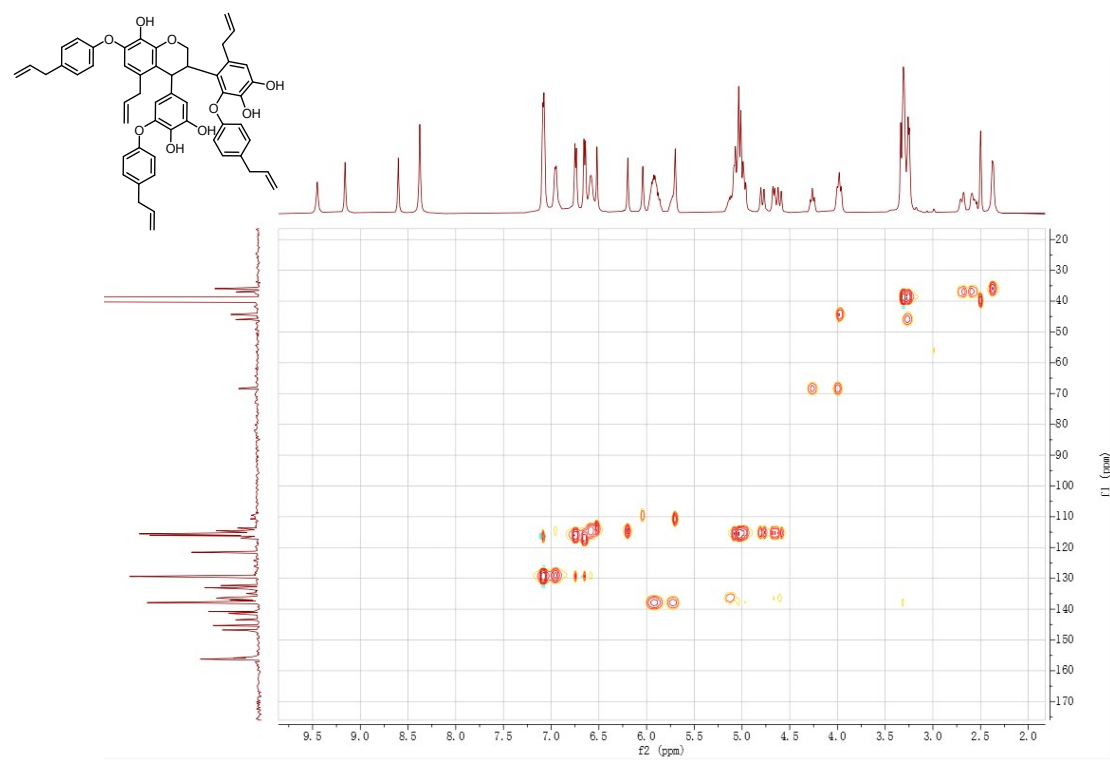

**Fig. S6.** HMBC spectra (400 MHz and 600 MHz) of maglignan A (1).

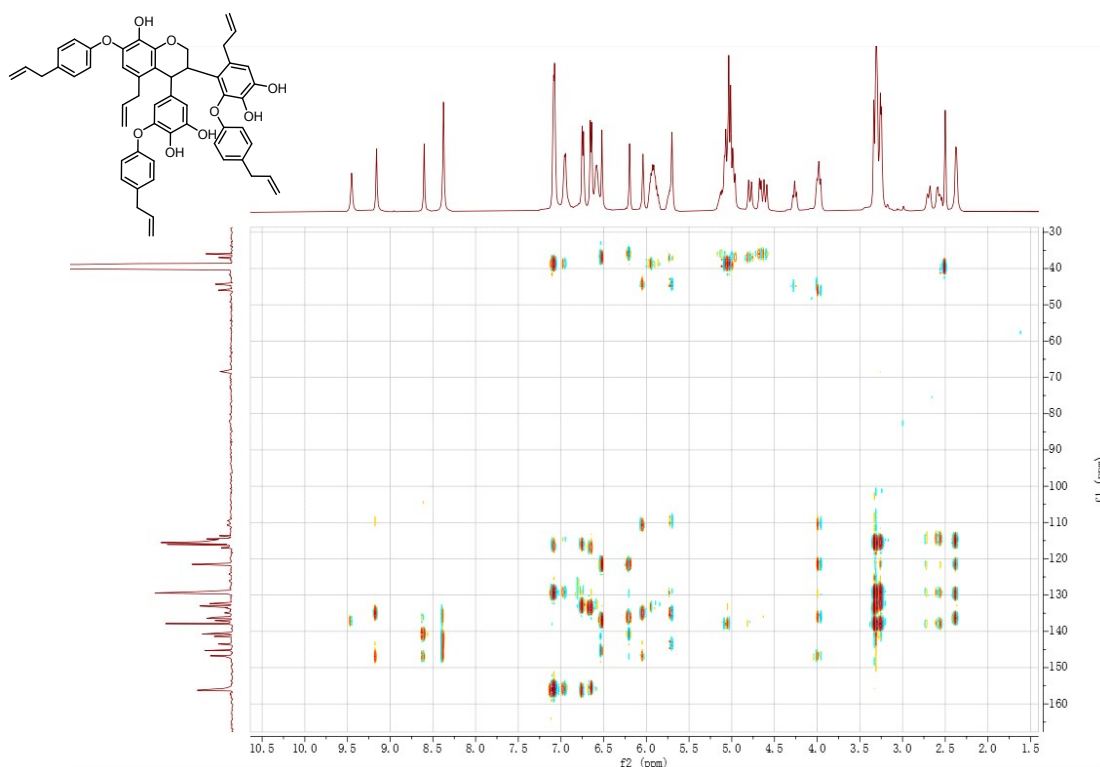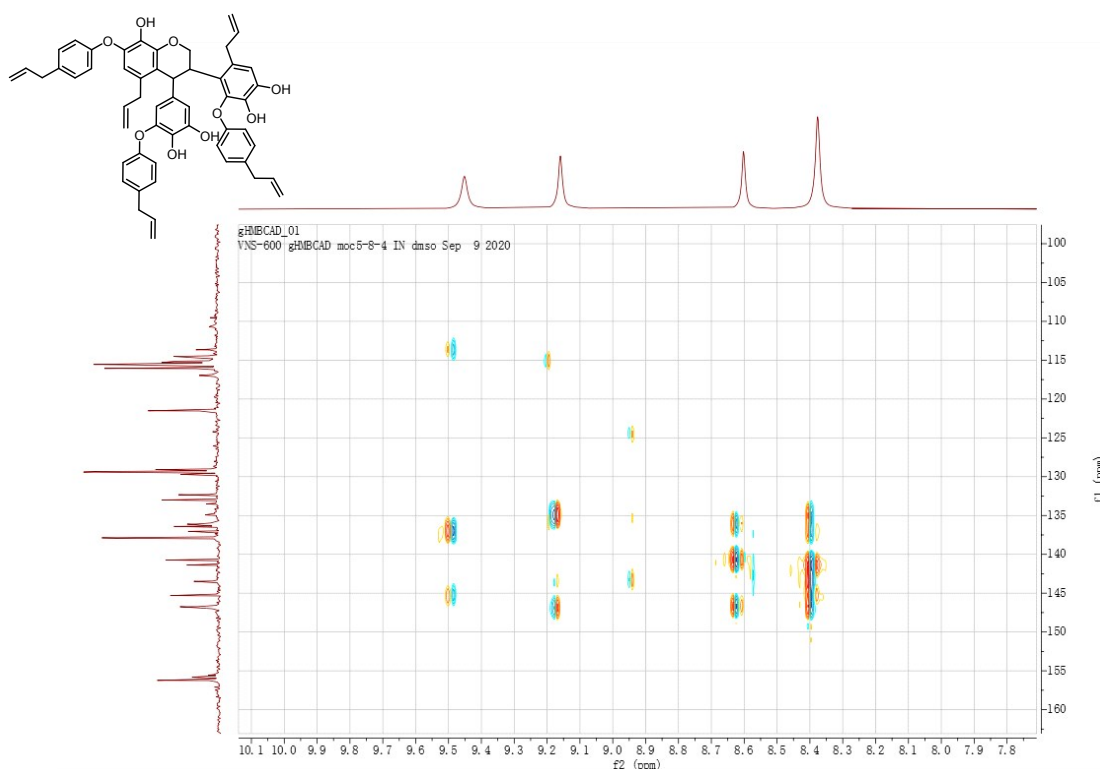

**Fig. S7.**  $^1\text{H}$ - $^1\text{H}$  COSY spectrum of maglignan A (**1**).

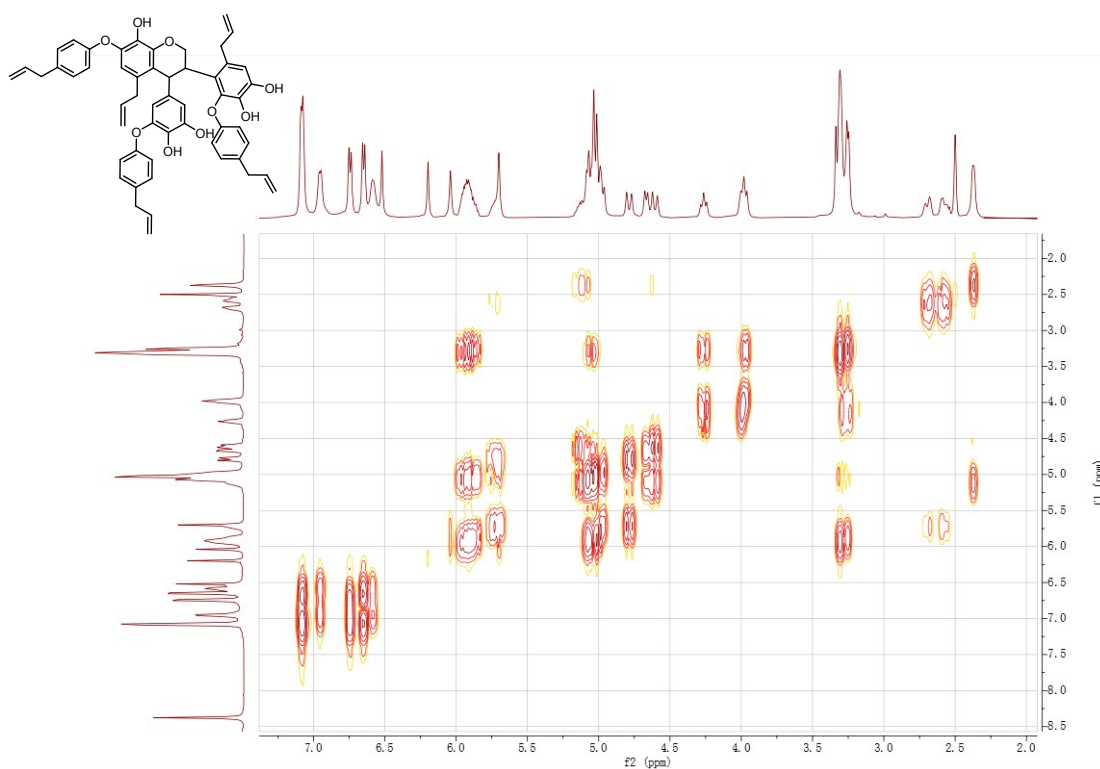

**Fig. S8.** NOESY spectrum of maglignan A (**1**).

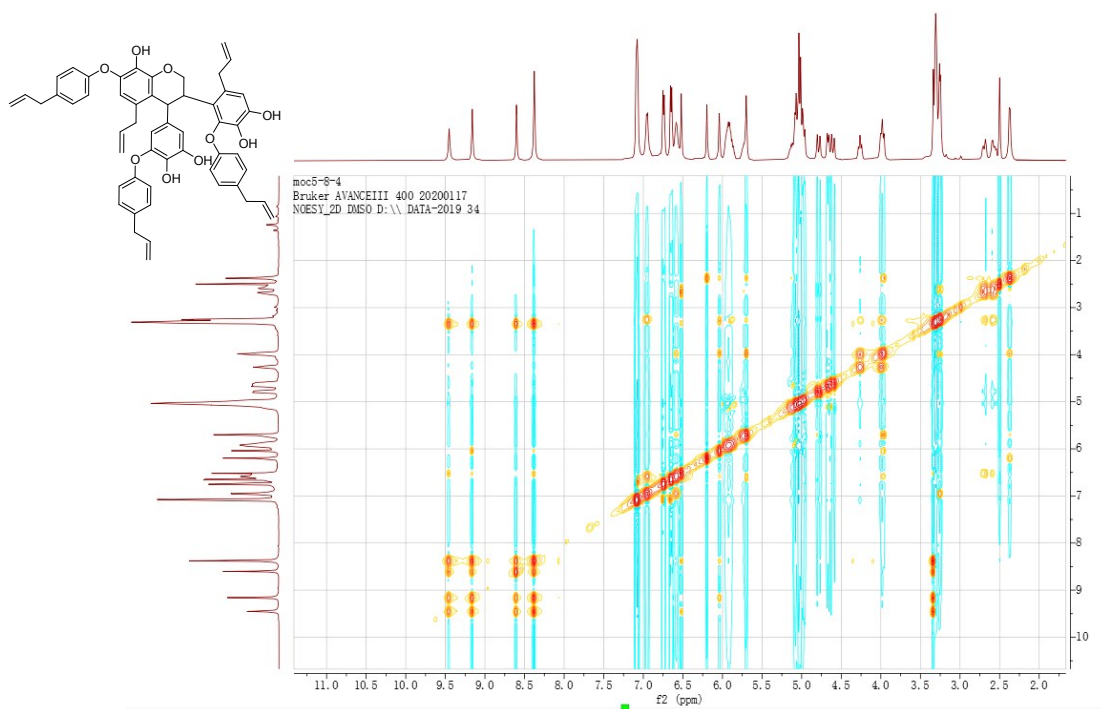



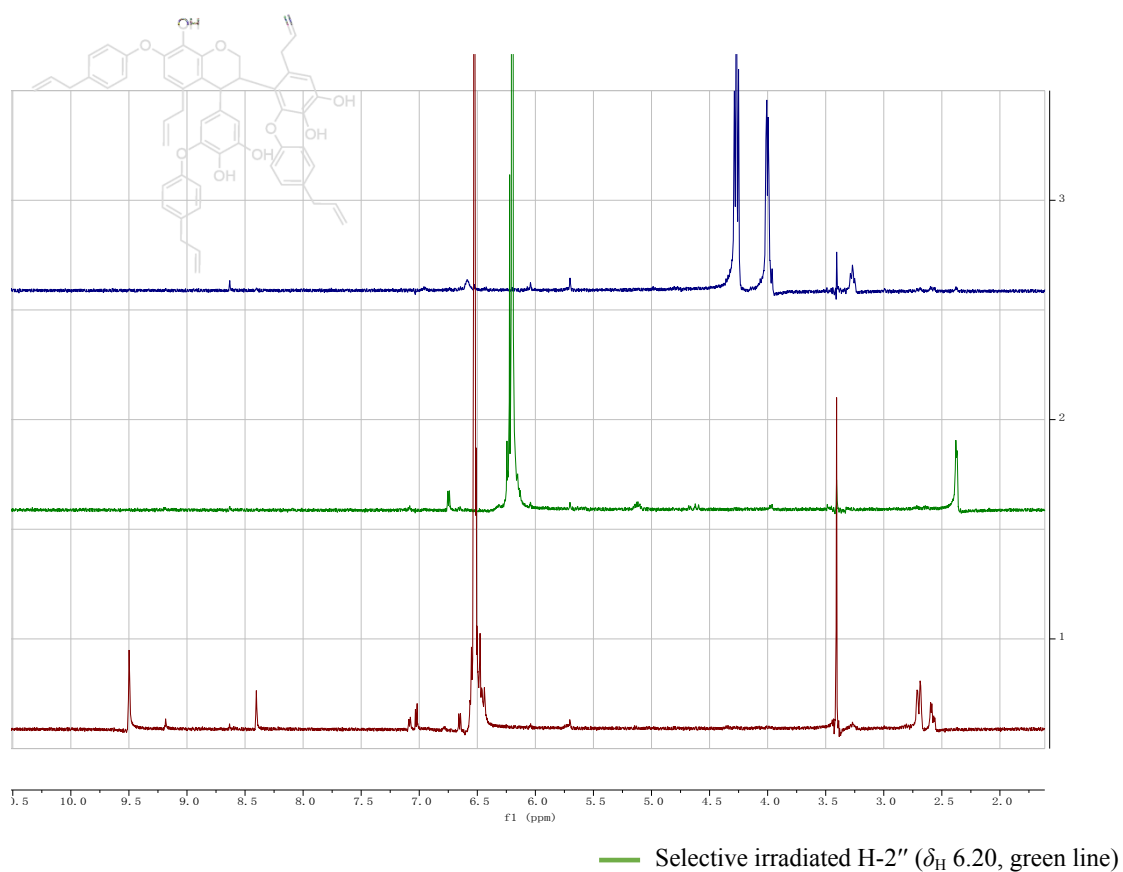

Fig. S9. IR spectrum of maglignan A (1).

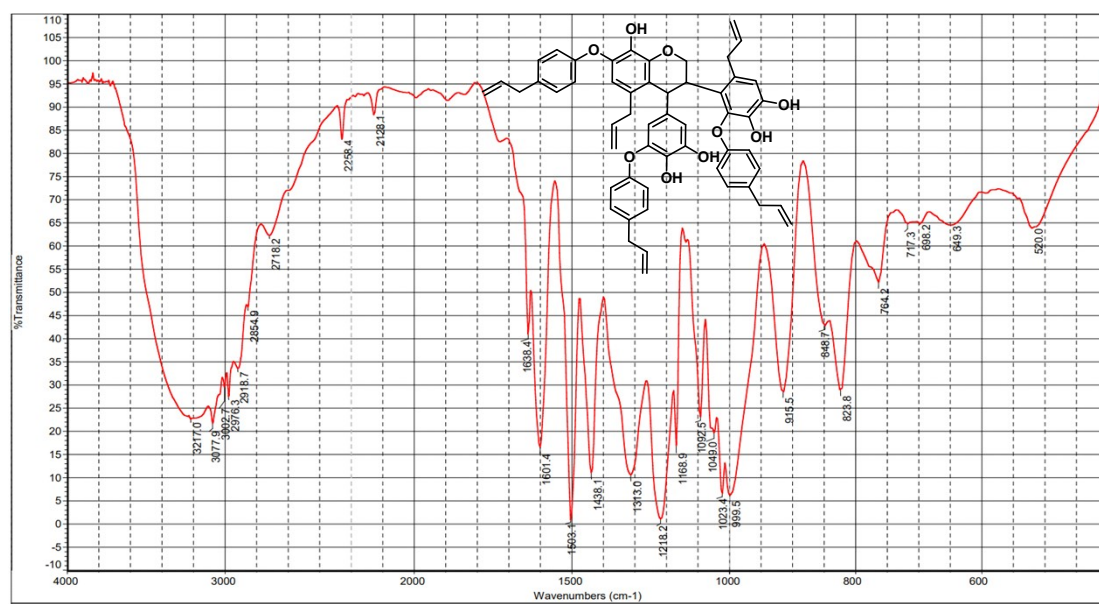

Fig. S10. UV spectrum of maglignan A (1).

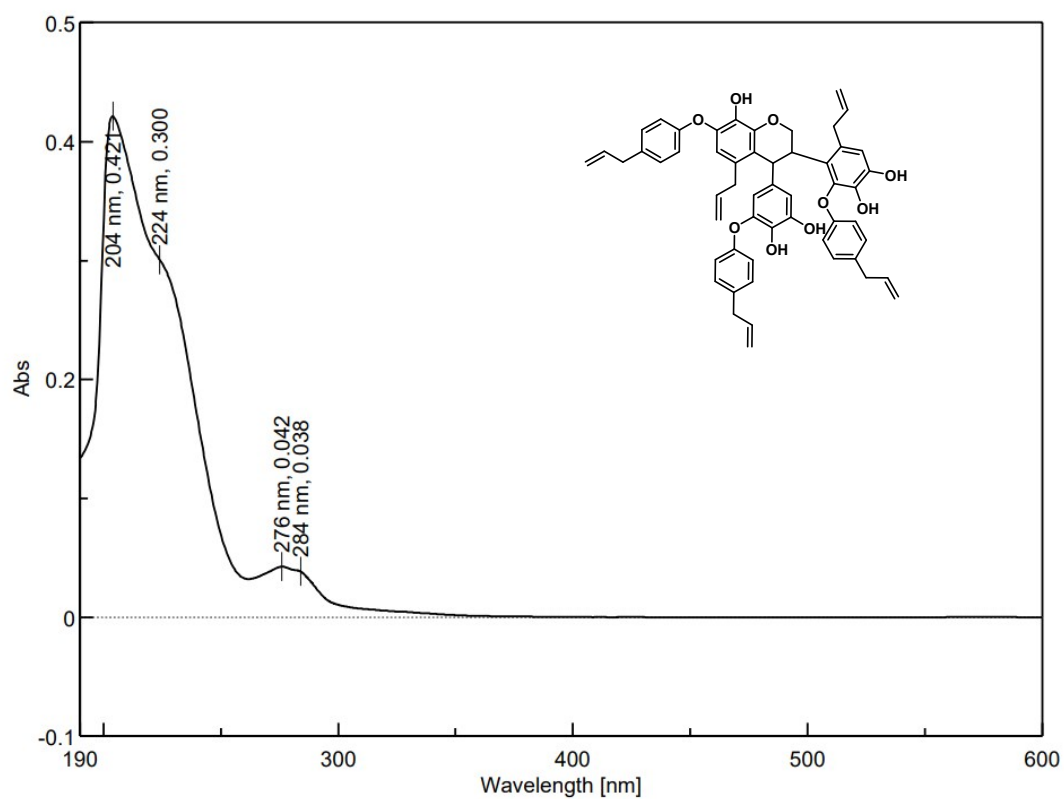

Fig. S11 HPLC separation chromatogram of (+)/(-)-1 on the chiral AD-H column.

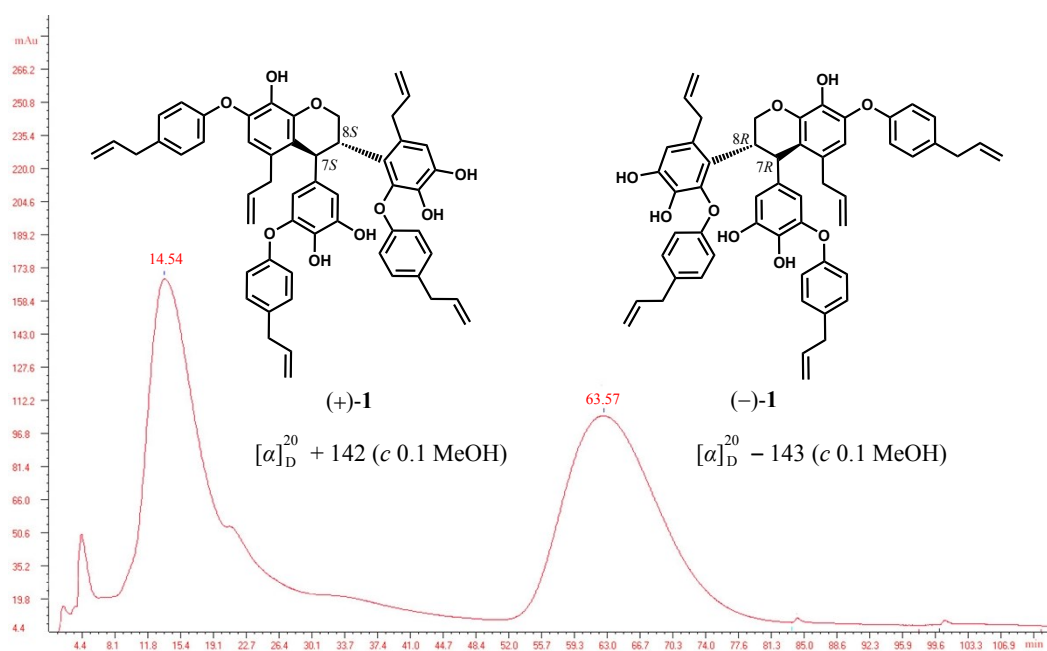

**Fig. S12.** ECD spectrum of maglignan A (**1**).

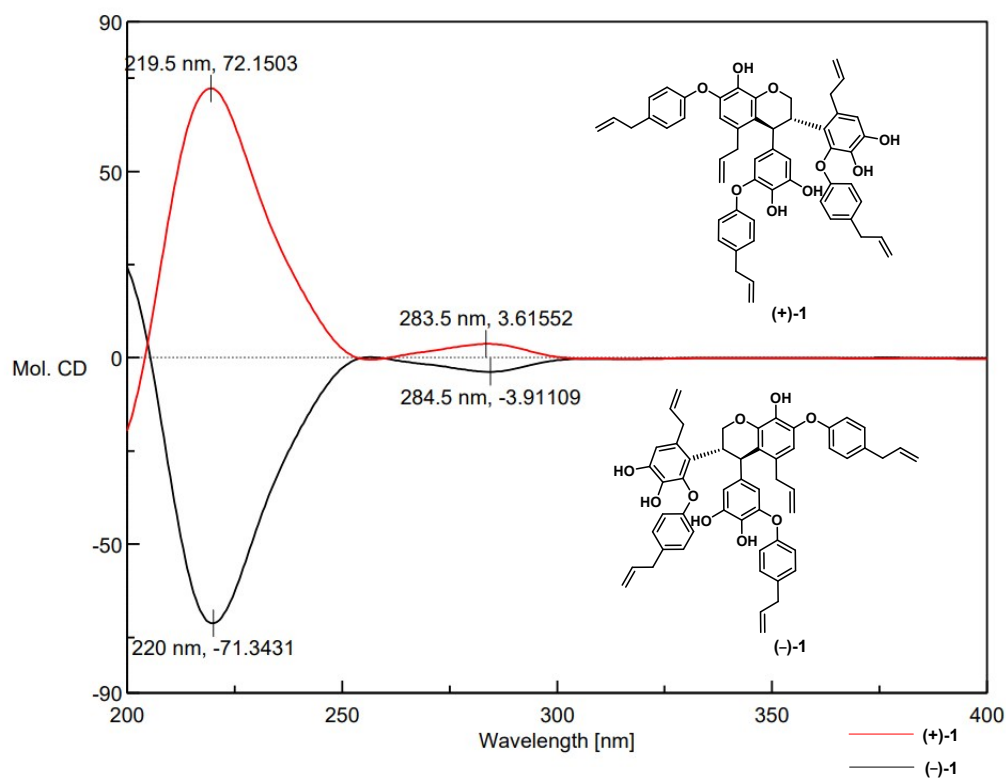

**Fig. S13.** HRESIMS spectrum of maglignan A (**1**).

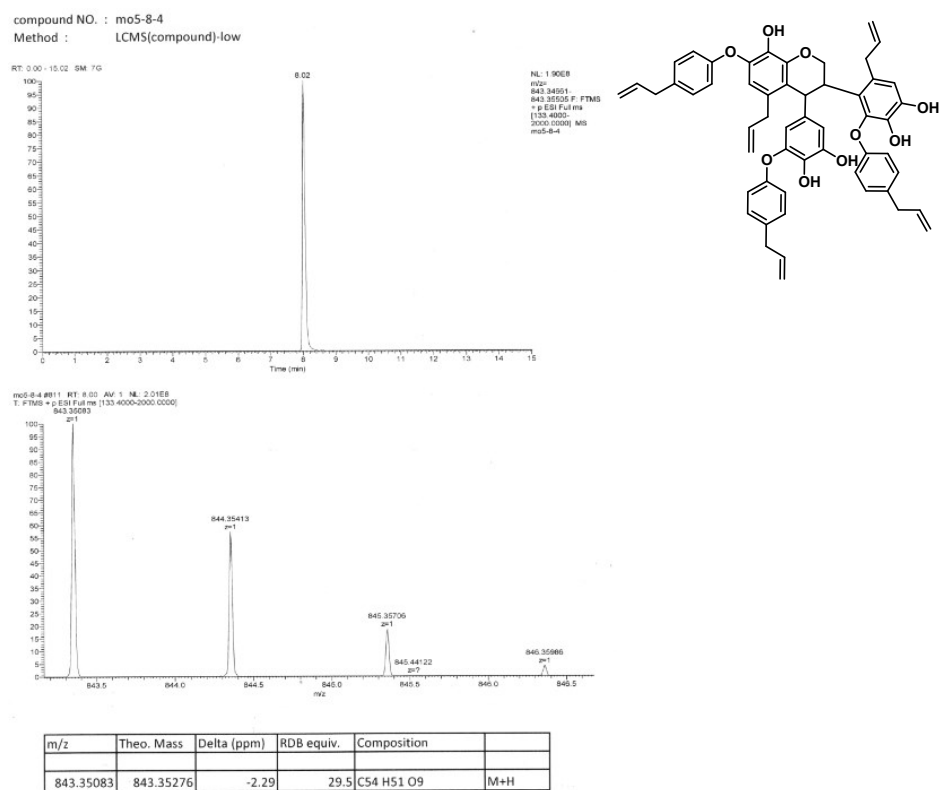

## Maglignan B (2)

Fig. S14. <sup>1</sup>H NMR spectrum (600 MHz, DMSO-*d*<sub>6</sub>) of maglignan B (2).

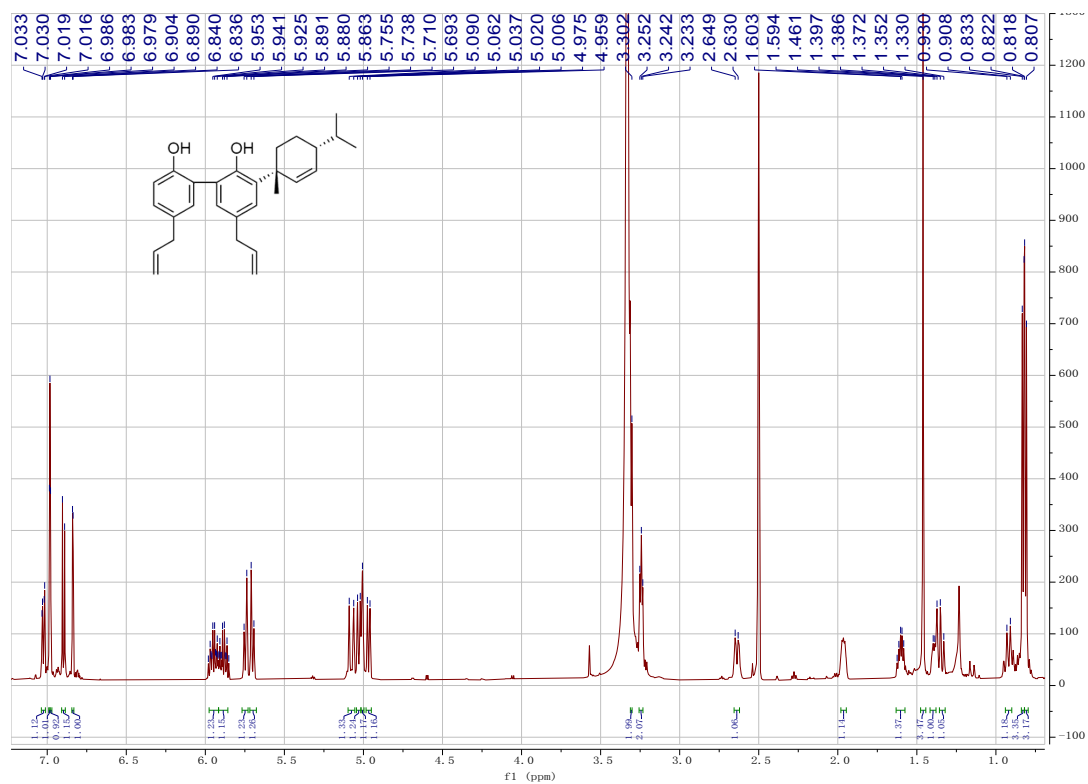

Fig. S15. <sup>13</sup>C NMR spectrum (100 MHz, DMSO-*d*<sub>6</sub>) of maglignan B (2).

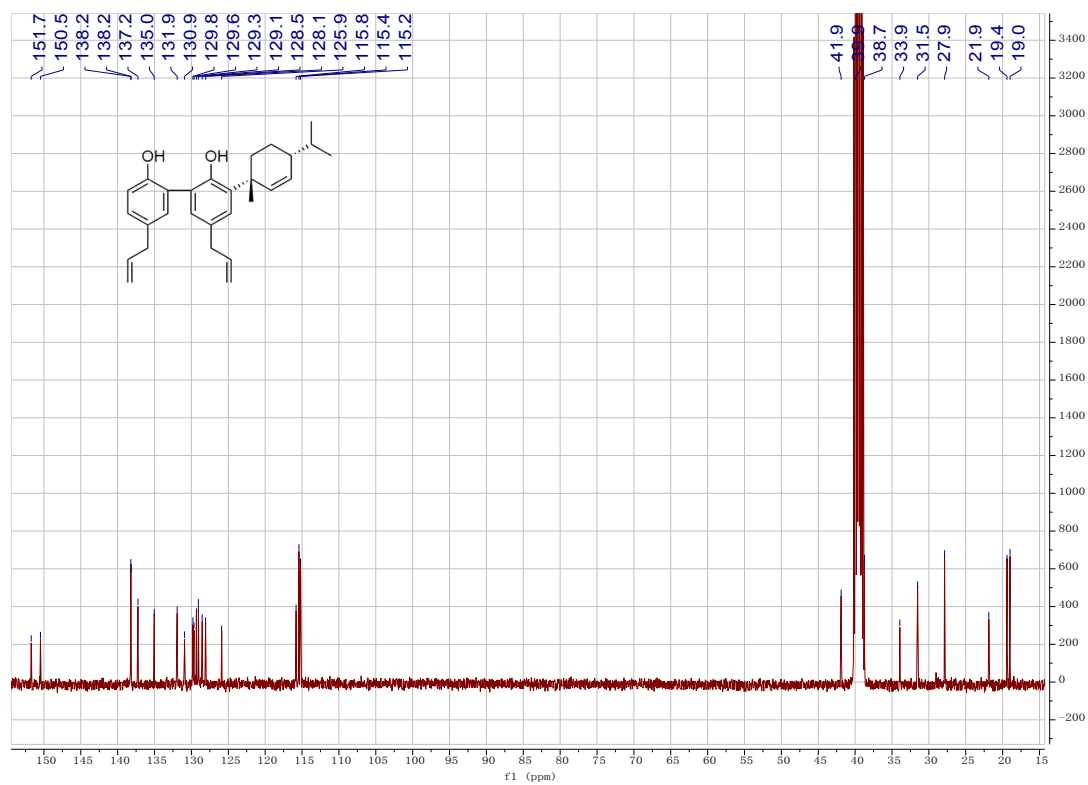

Fig. S16. DEPT spectrum of maglignan B (2).

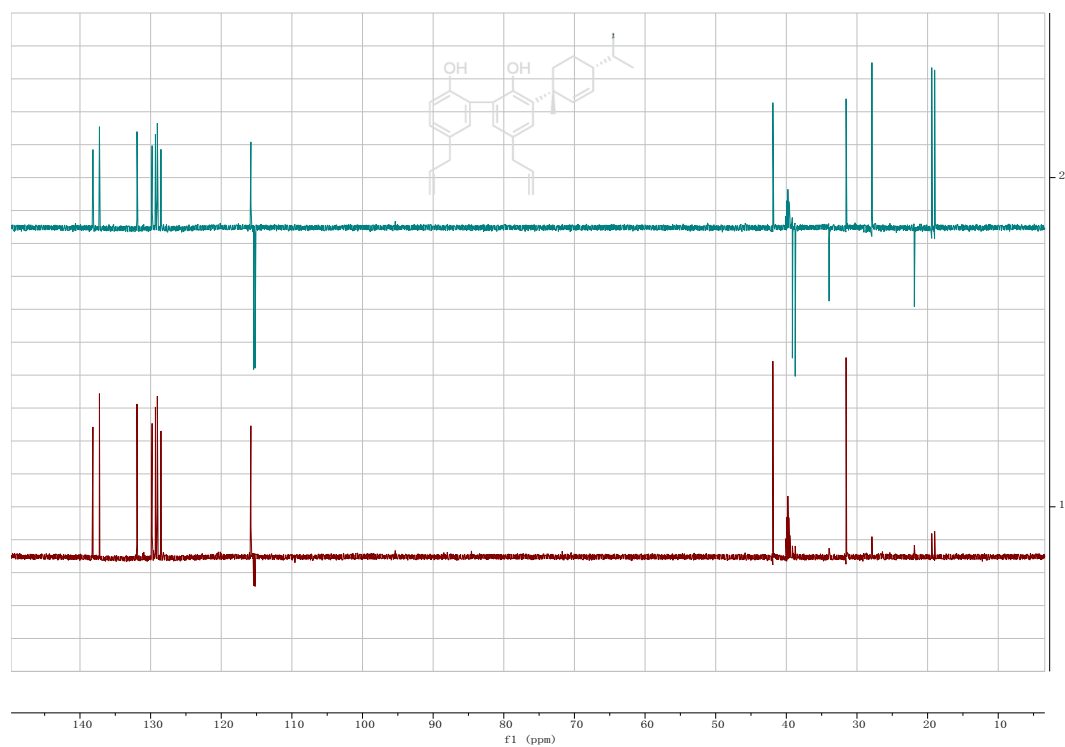

Fig. S17. HSQC spectrum of maglignan B (2).

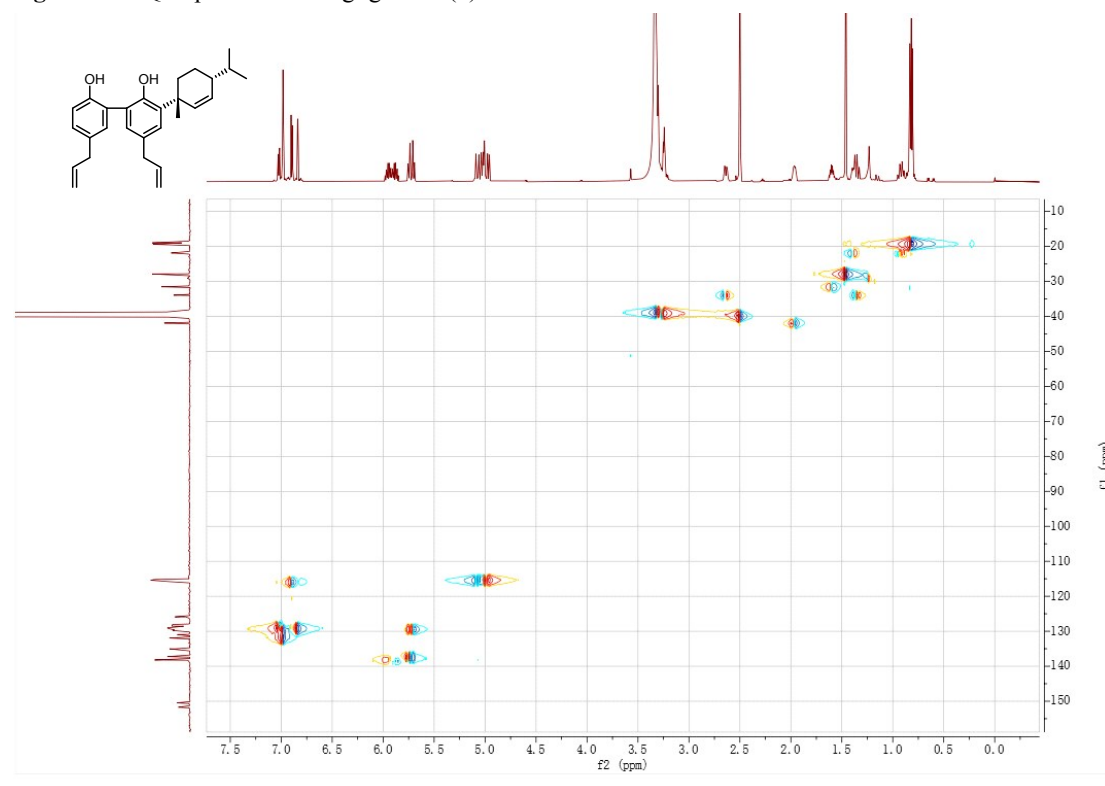

Fig. S18. HMBC spectrum of maglignan B (2).

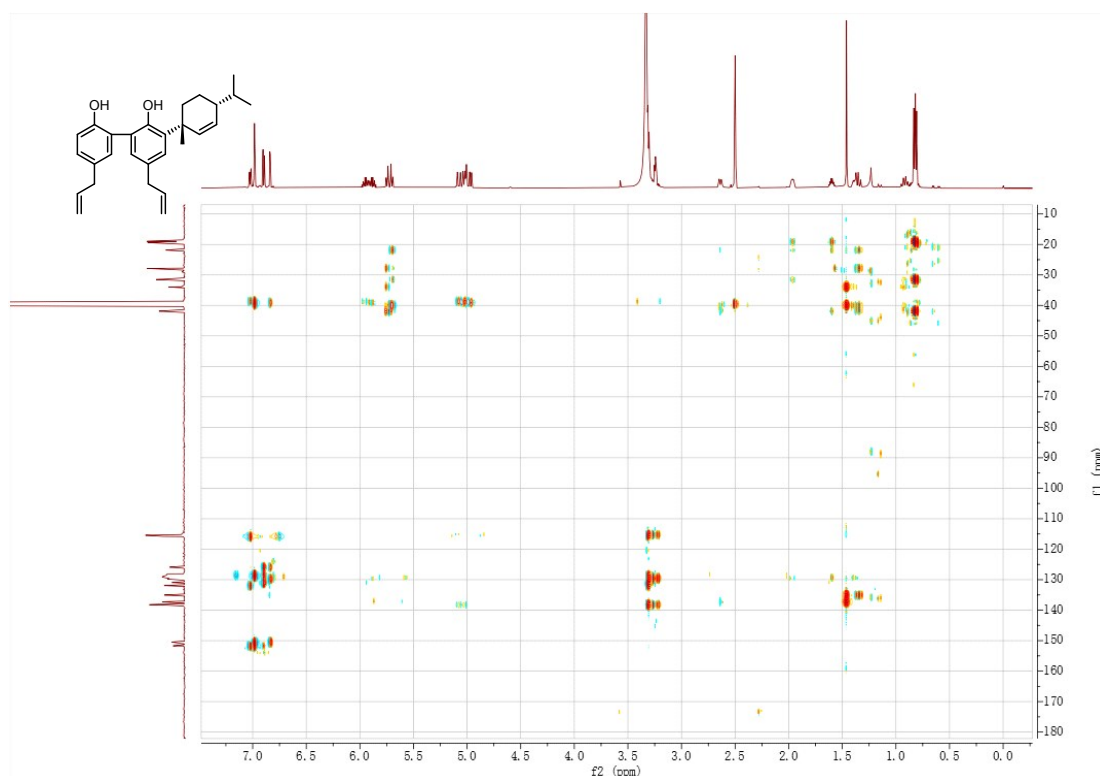

Fig. S19. <sup>1</sup>H-<sup>1</sup>H COSY spectrum of maglignan B (2).

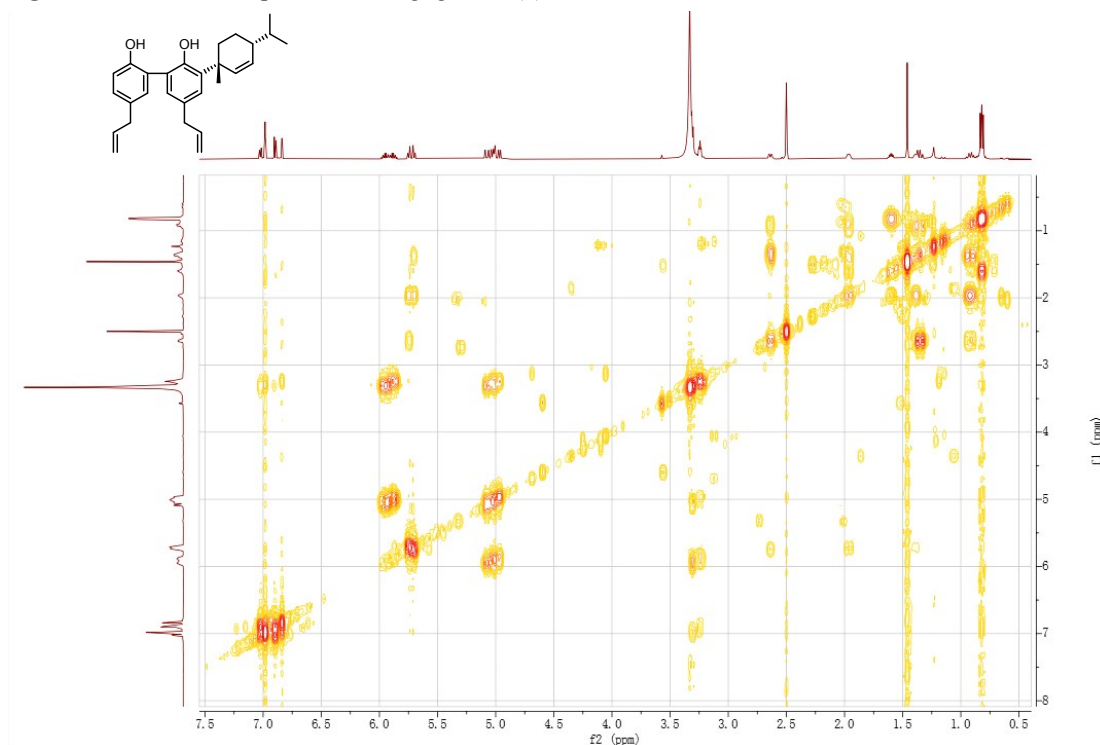

Fig. S20. NOESY spectrum of maglignan B (2).

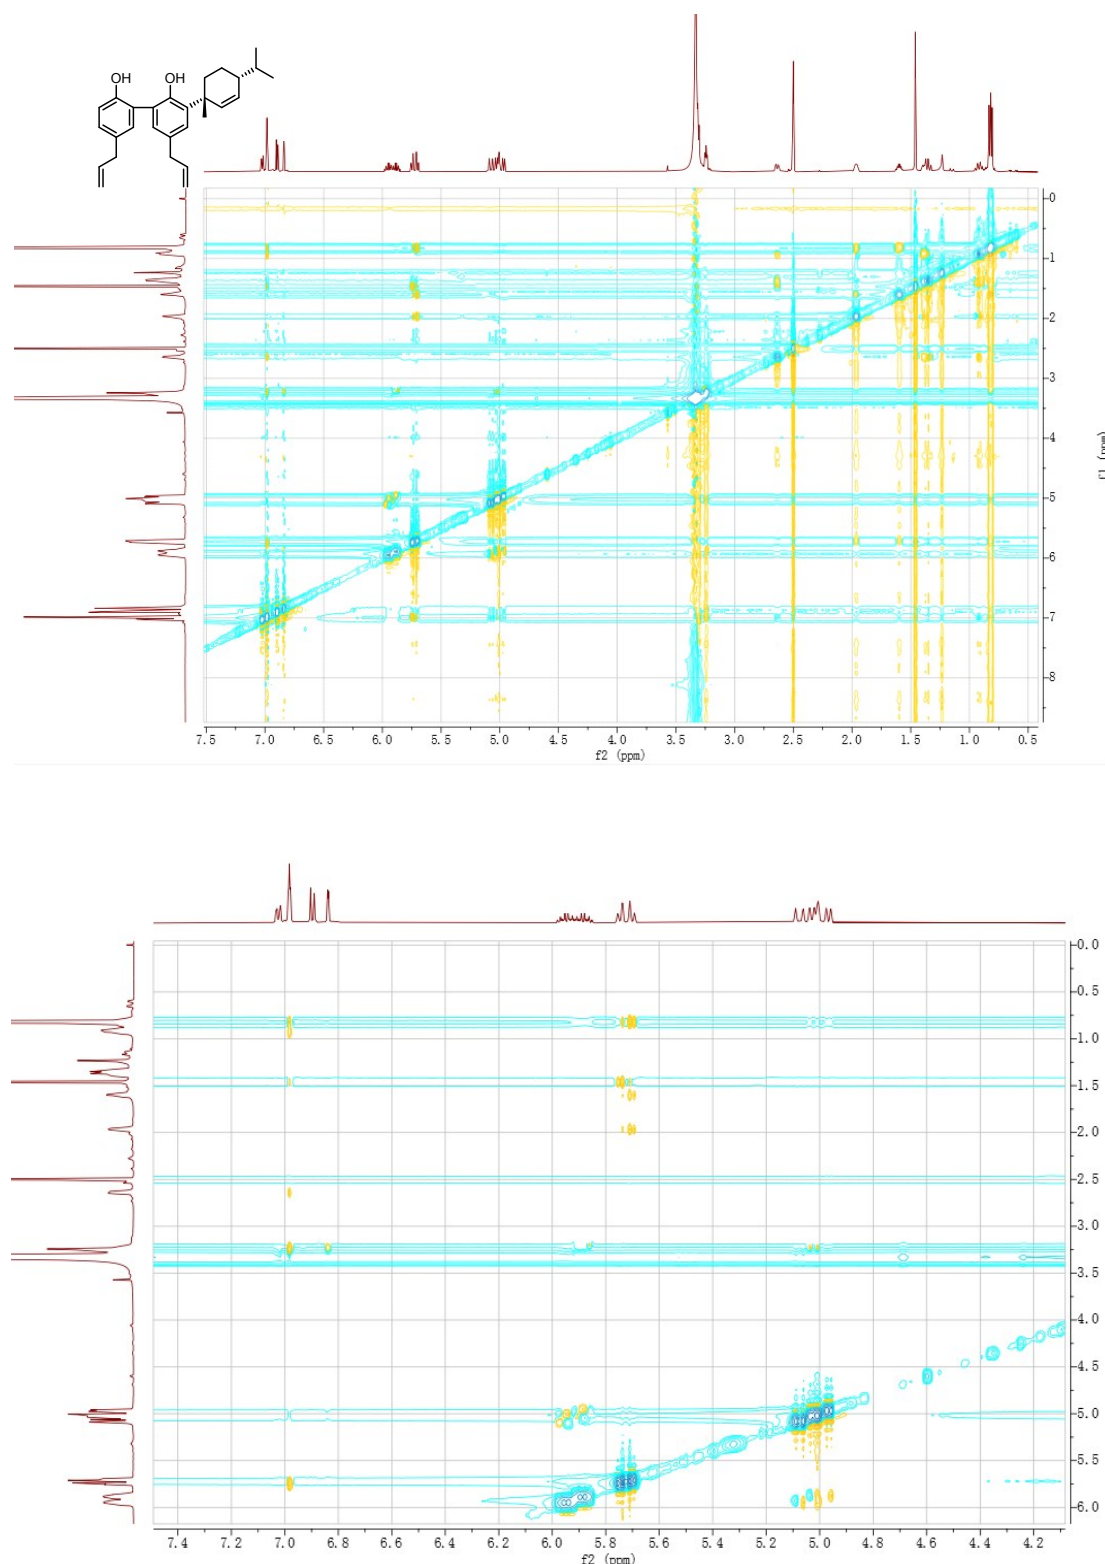

Fig. S21. IR spectrum of maglignan B (2).

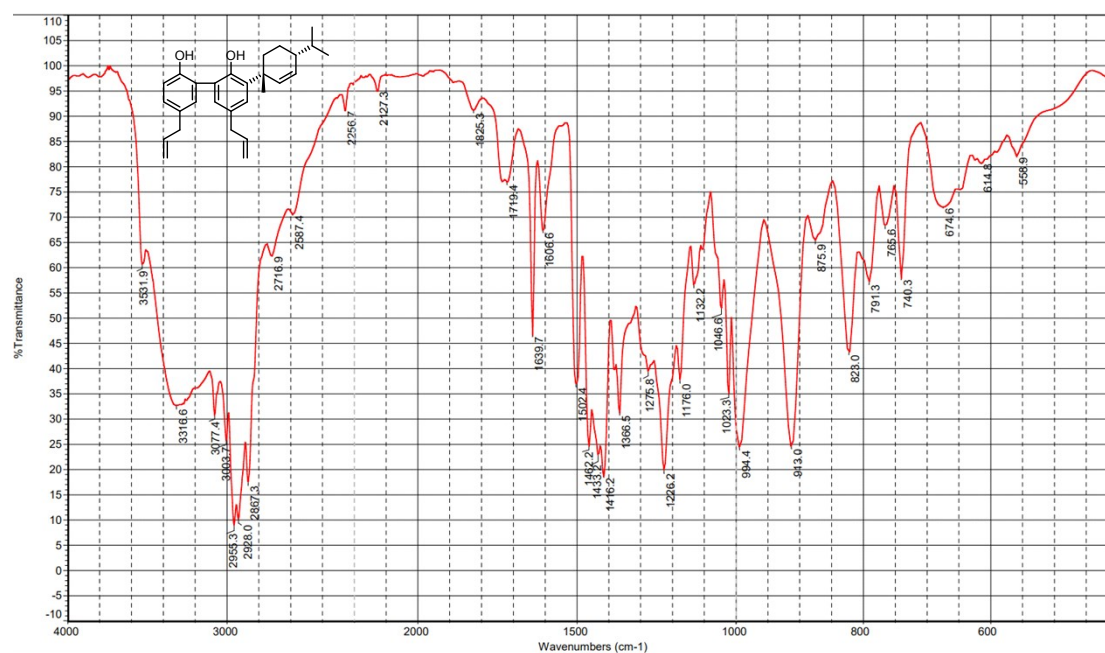

Fig. S22. UV spectrum of maglignan B (2).

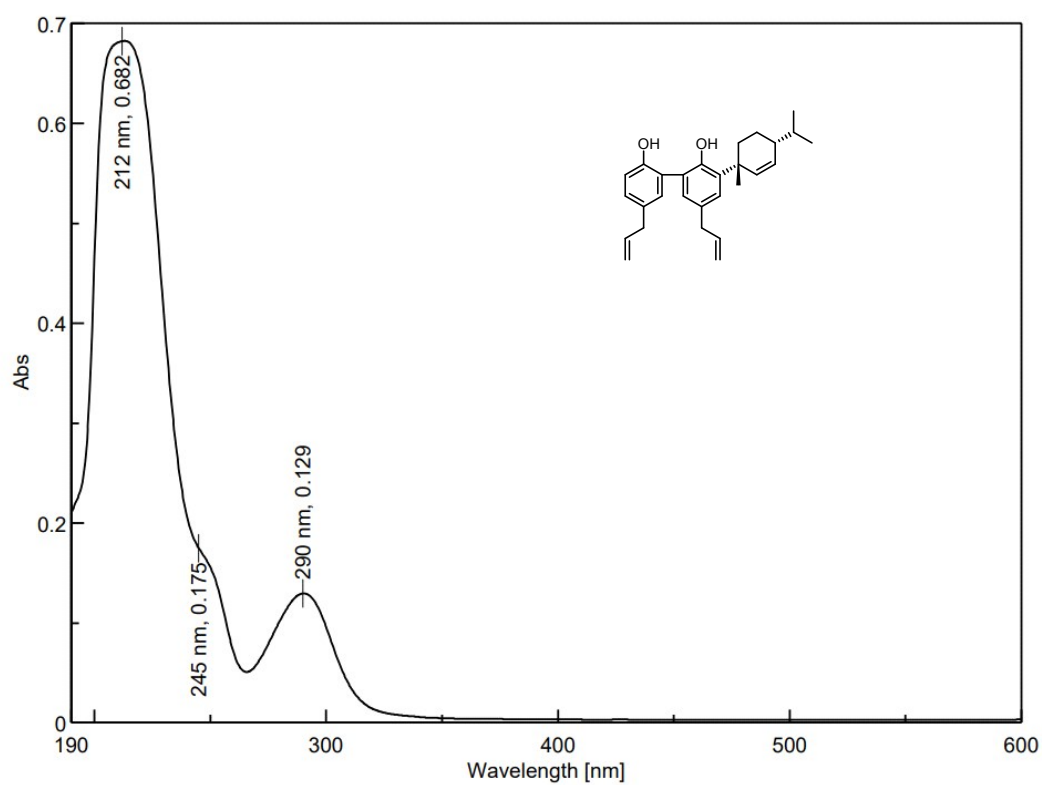



Fig. S23. ECD spectrum of maglignan B (2).

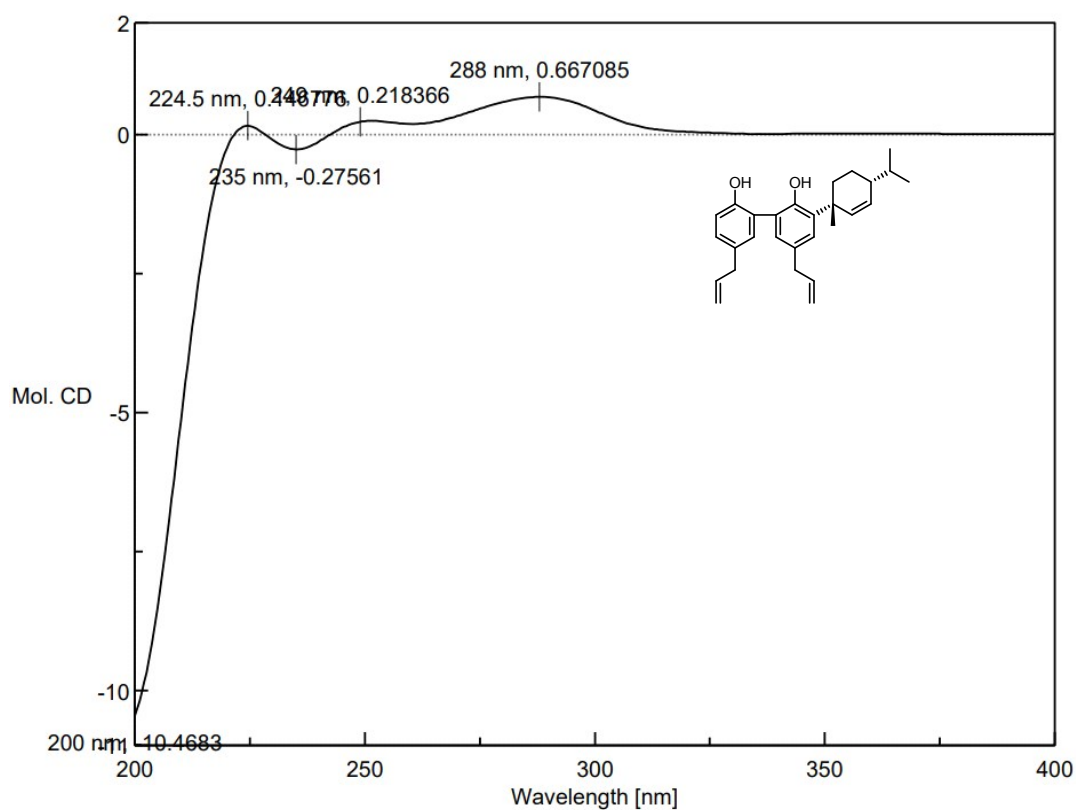

Fig. S24. HRESIMS spectrum of maglignan B (2).

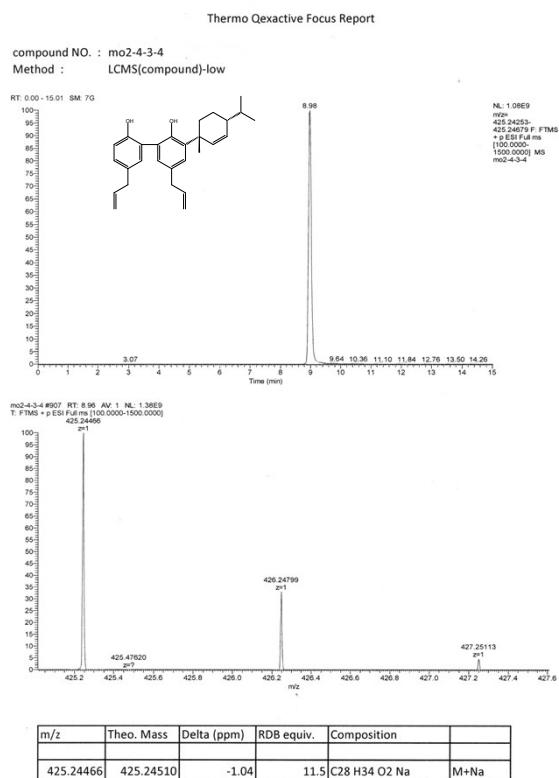

### Maglignan C (3)

Fig. S25. <sup>1</sup>H NMR spectrum (400 MHz, DMSO-*d*<sub>6</sub>) of maglignan C (3).

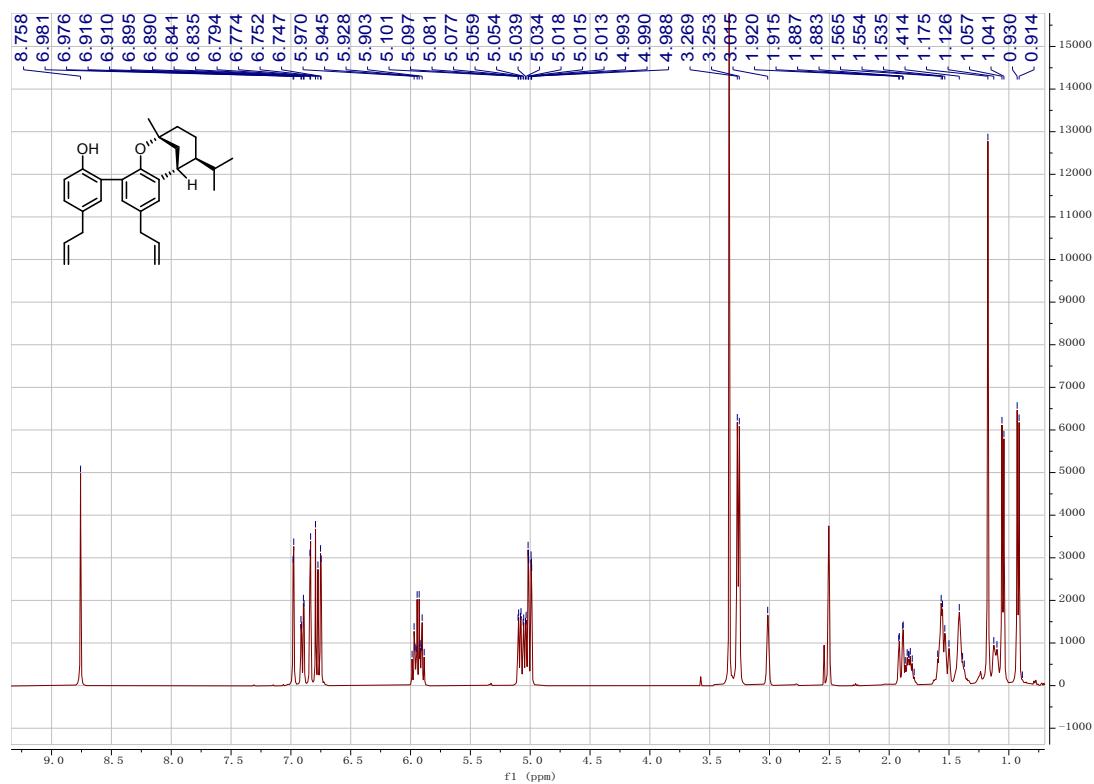

Fig. S26. <sup>13</sup>C NMR spectrum (100 MHz, DMSO-*d*<sub>6</sub>) of maglignan C (3).

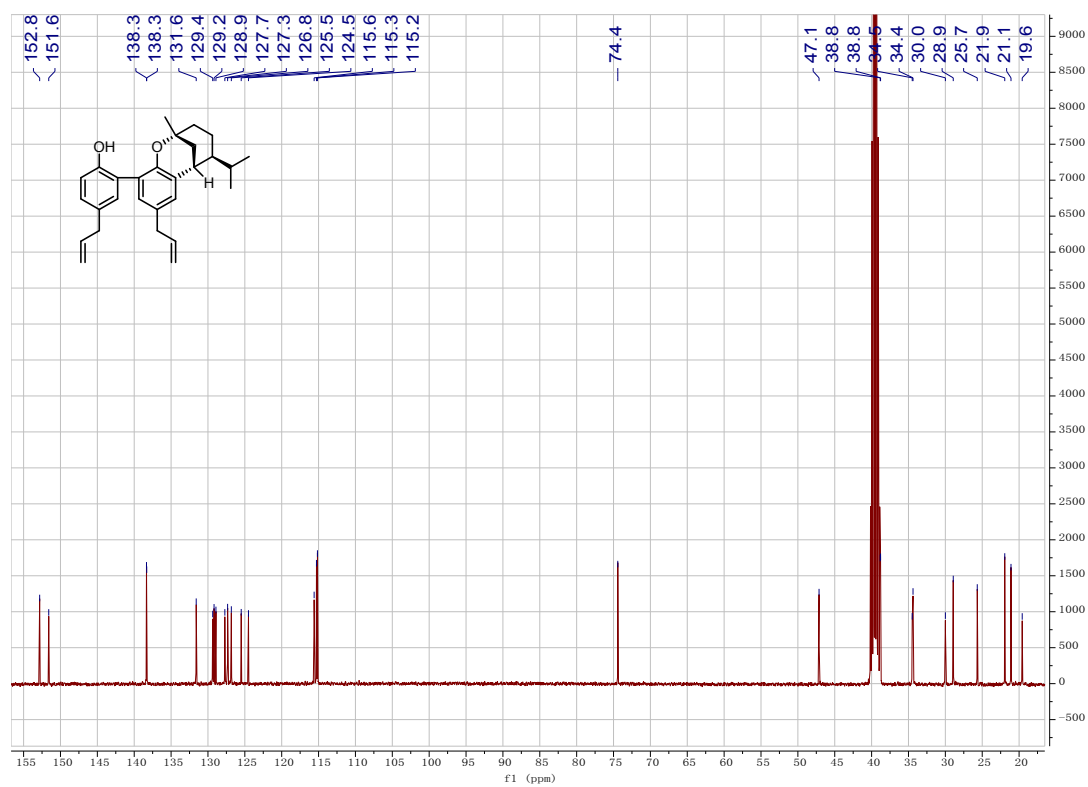

Fig. S27. DEPT spectrum of maglignan C (3).

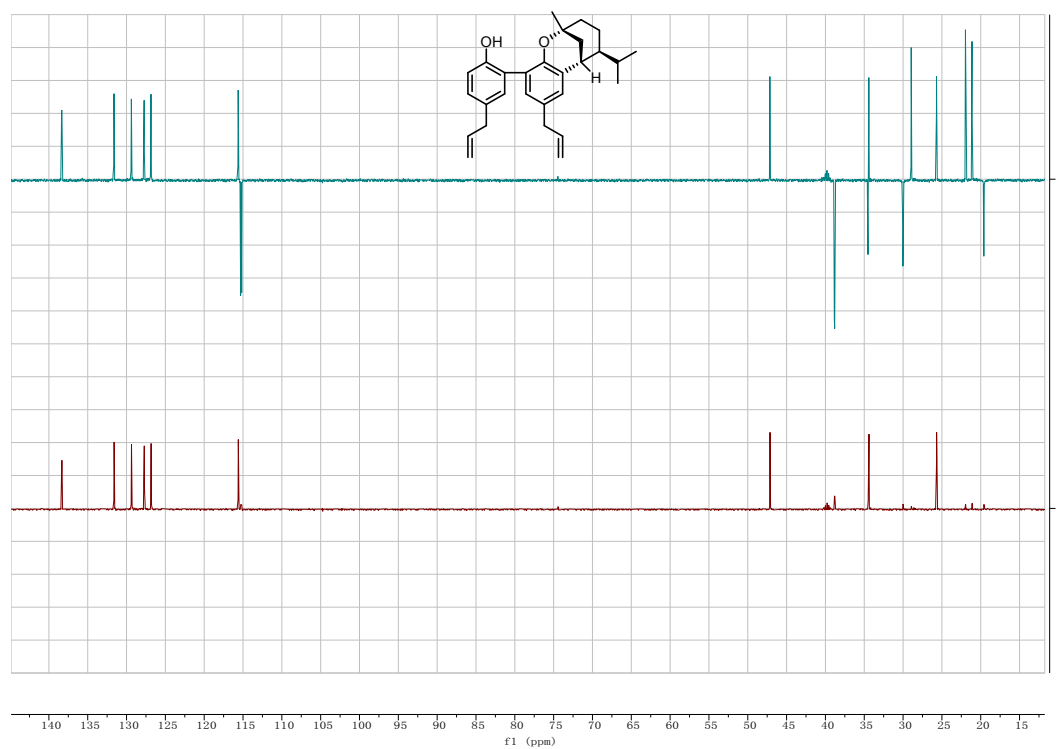

Fig. S28. HSQC spectrum of maglignan C (3).

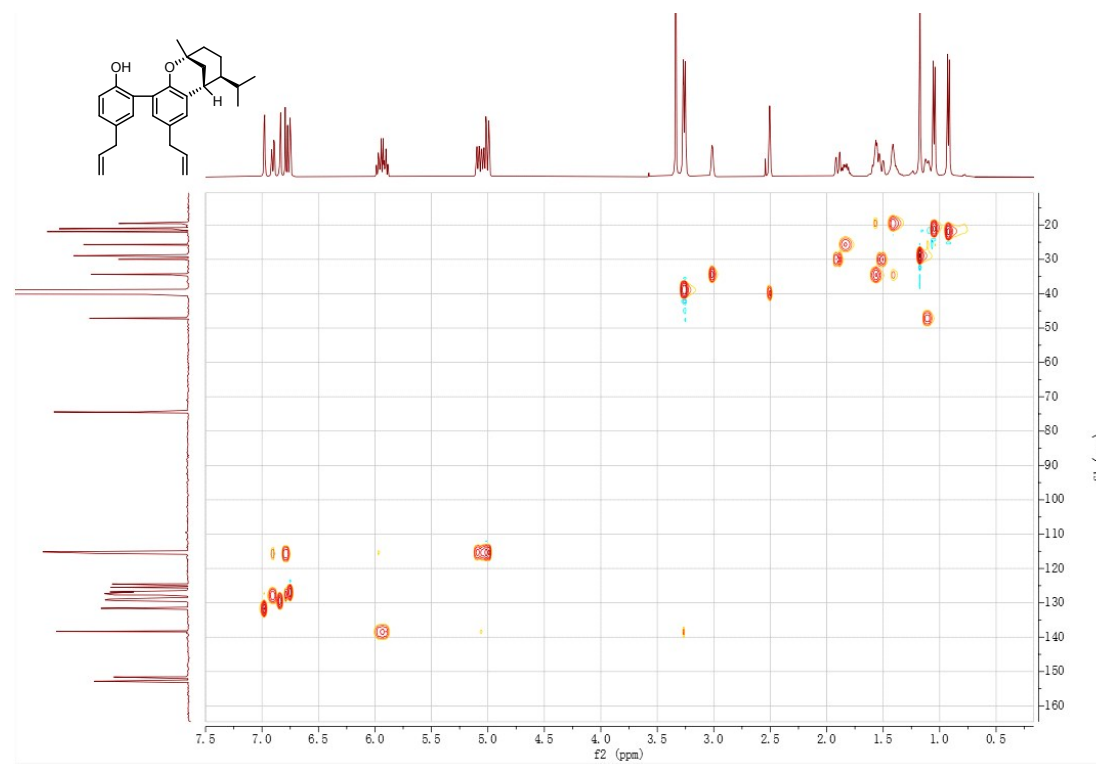

Fig. S29. HMBC spectrum of maglignan C (3).

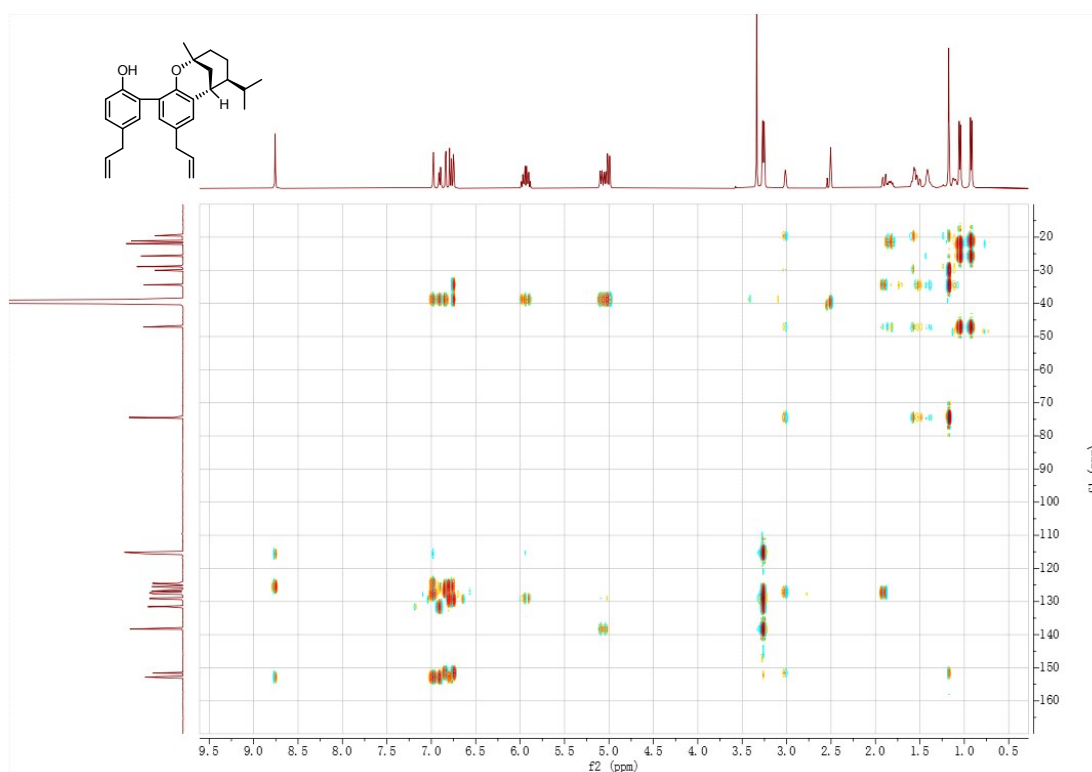

Fig. S30.  $^1\text{H}$ - $^1\text{H}$  COSY spectrum of maglignan C (3).

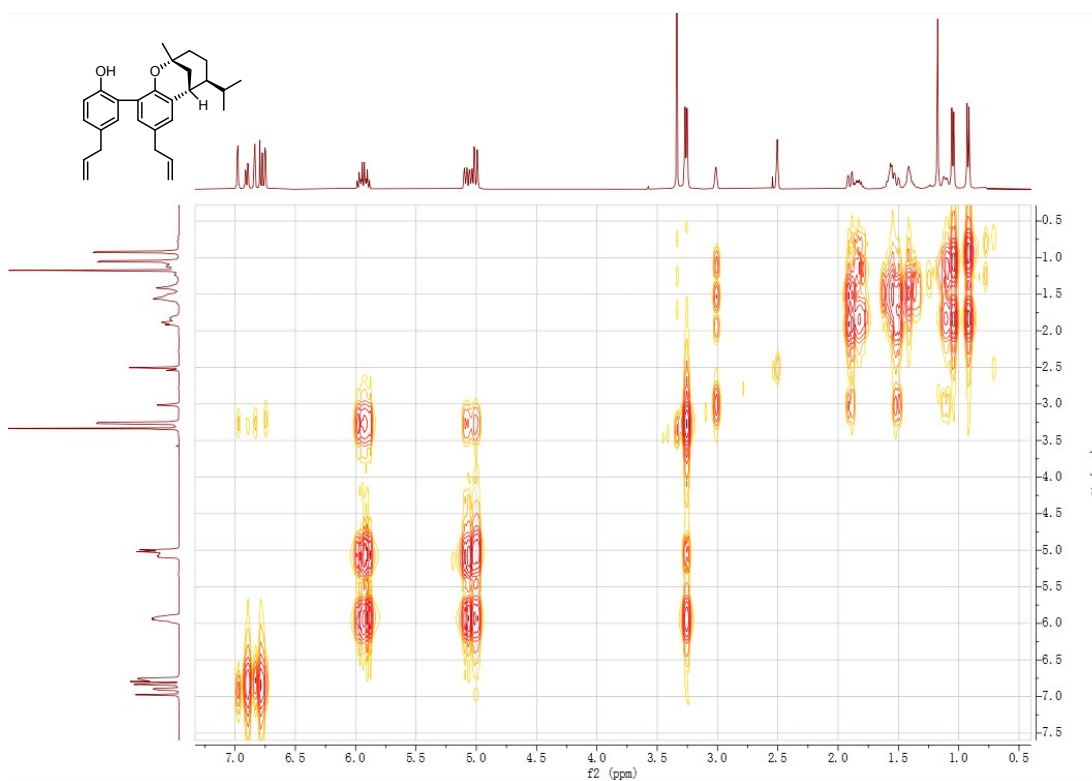

Fig. S31. NOESY spectrum of maglignan C (3).

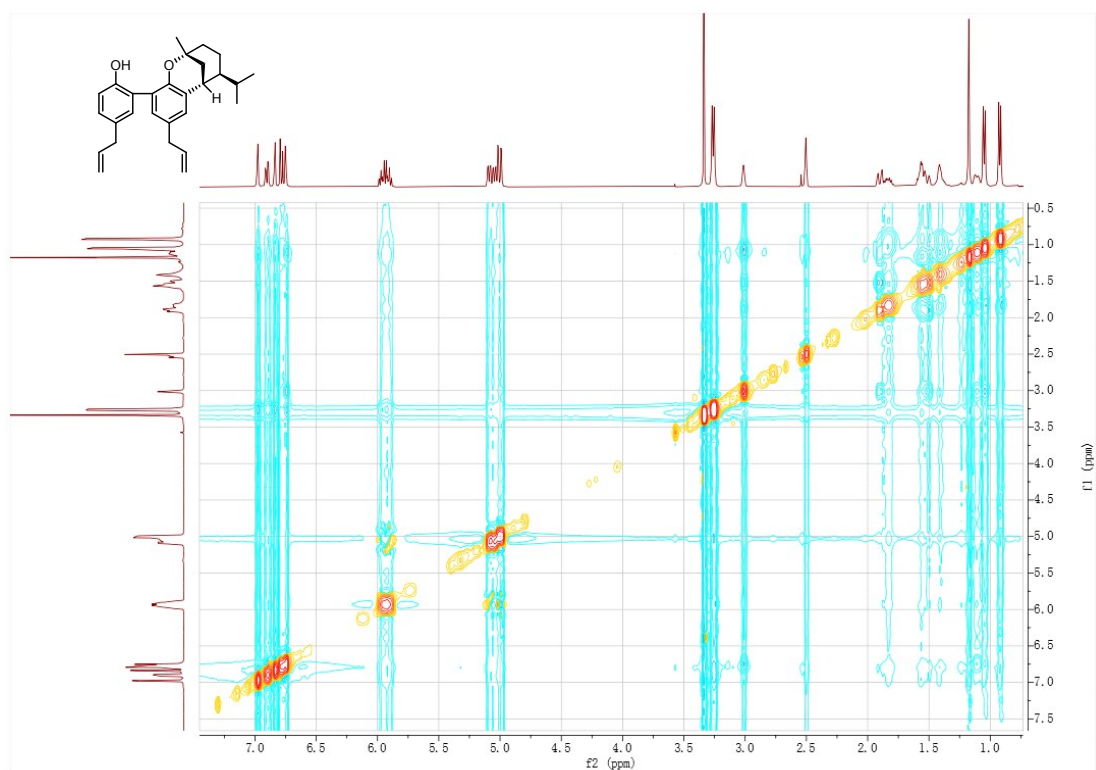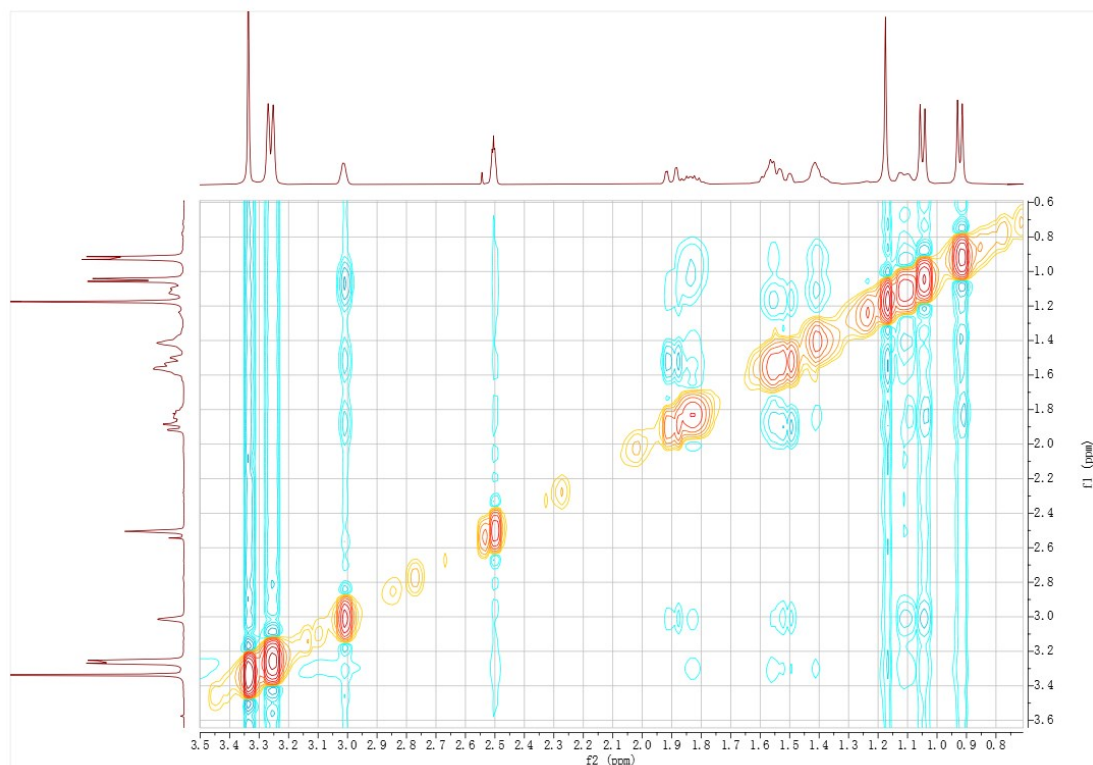

Fig. S32. IR spectrum of maglignan C (3).

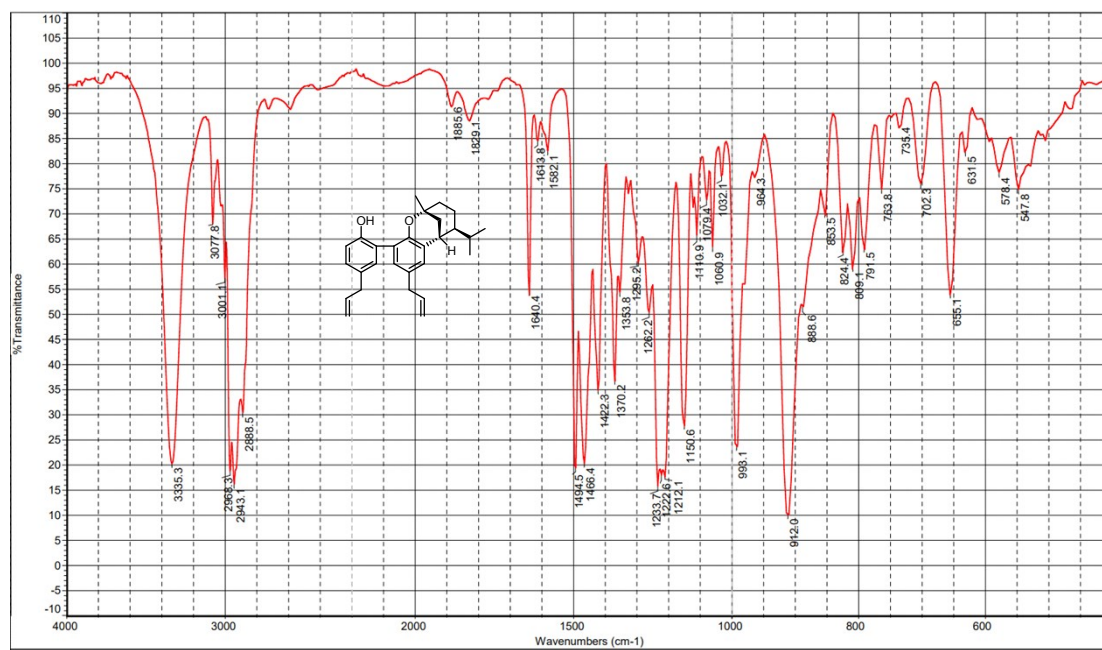

Fig. S33. UV spectrum of maglignan C (3).

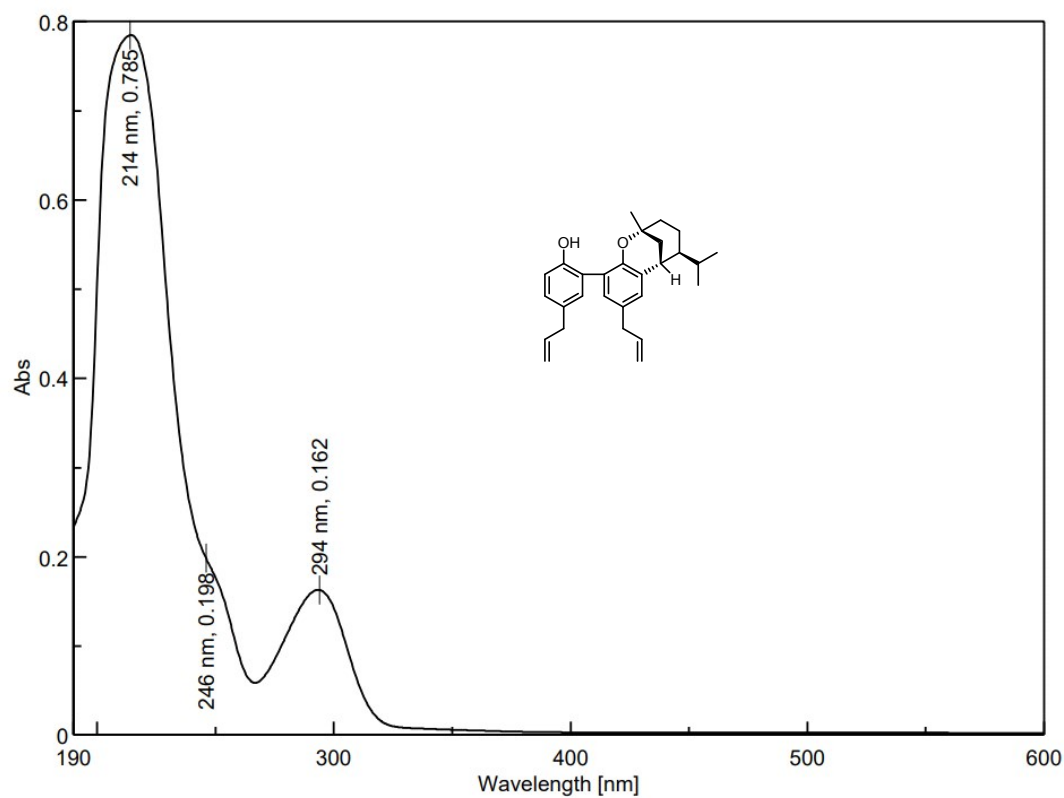

Fig. S34. CD spectrum of maglignan C (3).

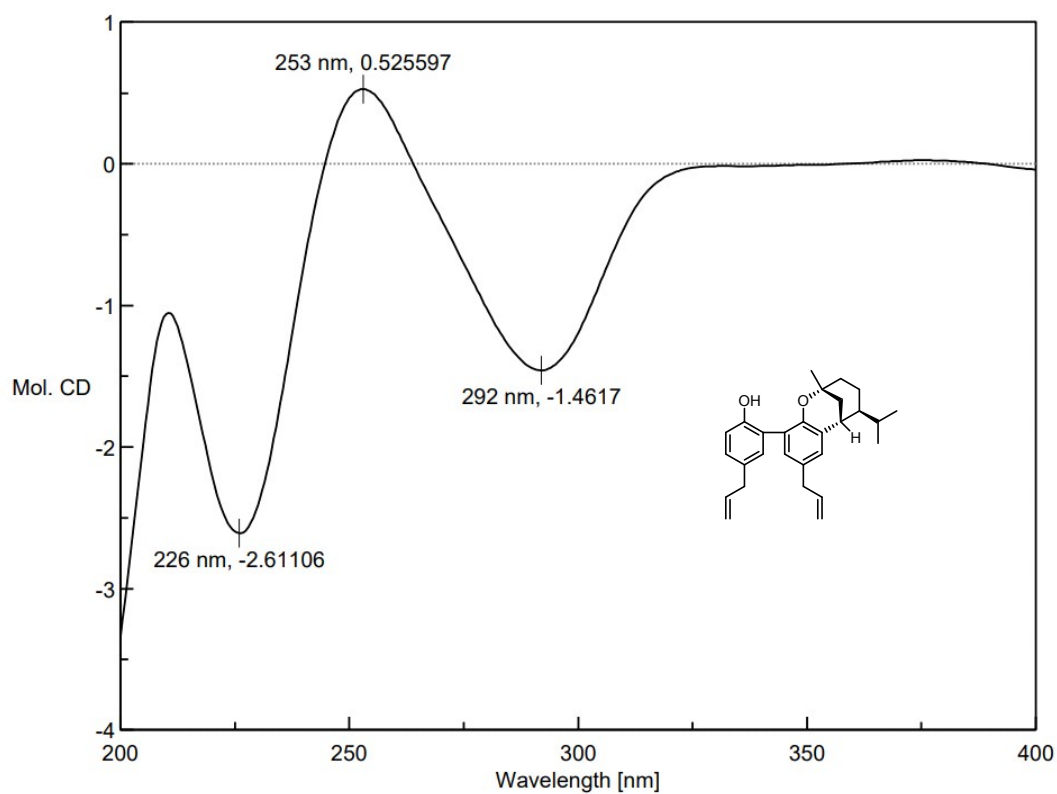

Fig. S35. HRESIMS spectrum of maglignan C (3).

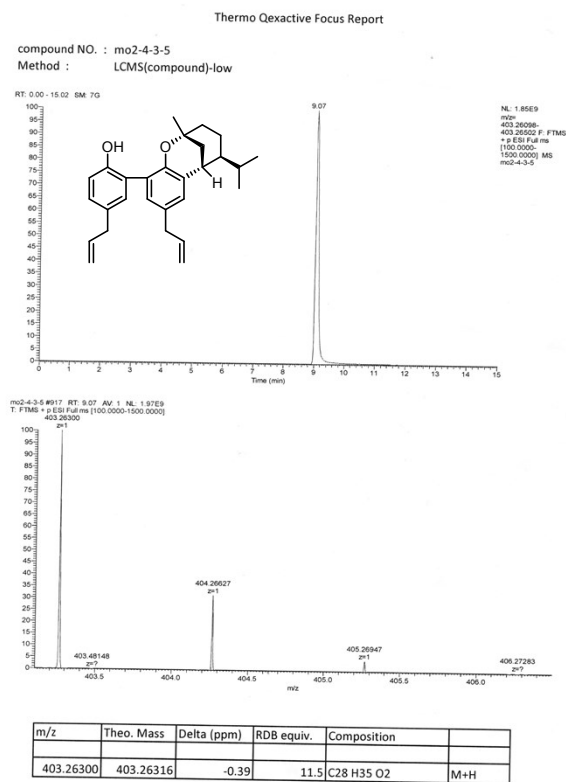

Supplement: d1qo00795e1.pdf [file d1qo00795e1.pdf]
